# Supplementary material for: Rhizocarpon geographicum Lichen Discloses a Highly Diversified Microbiota Carrying Antibiotic Resistance and Persistent Organic Pollutant Tolerance
Source: MDPI journal article supplement (doi:10.3390/microorganisms10091859), 2022-09-16
Supplement: s1 [file s1]

## **Supplementary Information for:**

# *Rhizocarpon geographicum* lichen discloses a highly diversified microbiota carrying antibiotic resistance and Persistent Organic Pollutants tolerance

Alice Miral<sup>1</sup>, Adam Kautsky<sup>2</sup>, Susete Alves-Carvalho<sup>2</sup>, Ludovic Cottret<sup>3</sup>, Anne-Yvonne Guillermin-Erckelboudt<sup>2</sup>, Manon Buguet<sup>1</sup>, Isabelle Rouaud<sup>1</sup>, Sylvain Tranchimand<sup>4</sup>, Sophie Tomasi<sup>1</sup> and Claudia Bartoli<sup>2\*</sup>

<sup>1</sup> Univ Rennes, CNRS, ISCR (Institut des Sciences Chimiques de Rennes) – UMR 6226, F-35000 Rennes, France.

<sup>2</sup> IGEPP, INRAE, Institut Agro, Univ Rennes, 35653, Le Rheu, France LIPME, INRAE.

<sup>3</sup> CNRS, Université de Toulouse, Castanet-Tolosan, France.

<sup>4</sup> Univ Rennes, Ecole Nationale Supérieure de Chimie de Rennes, CNRS, ISCR (Institut des Sciences Chimiques de Rennes) - UMR 6226, F-35000 Rennes, France.

**\*To whom correspondence may be addressed to:**

Claudia Bartoli

Phone: +33 2 23 48 51 96

Email: [claudia.bartoli-kautsky@inrae.fr](mailto:claudia.bartoli-kautsky@inrae.fr)

### **This file includes:**

Supplementary Methods

Supplementary Tables

Supplementary Figures

## **SUPPLEMENTARY METHODS**

### **Media used for bacteria isolation from *R. geographicum***

Media codes are indicated into parentheses after the medium name. This code has been added to the bacterial strains and it represents a code belonging to a larger list of media developed at the IGEPP Laboratory (INRAE, Bretagne, France).

Product references are reported to allow the repeatability of the preparation.

#### **Nutrient Agar (01B)**

##### **Per Liter of medium:**

|                                                   |       |
|---------------------------------------------------|-------|
| Osmotic water                                     | 1 L   |
| Beef extract (VWR, Reference: 1.03979.0500 500 g) | 3.0 g |
| Peptone (GICO, Reference: 211677 500 g)           | 5.0 g |
| Glucose (Sigma, Reference: 16301 1 kg)            | 1.0 g |
| Yeast extract (BD, Reference 212750 500 g)        | 0.5 g |
| Bacto Agar (BD, Reference 214010 500 g)           | 15 g  |

After autoclaving, add 100 mg.L<sup>-1</sup> of cycloheximide (Sigma, Reference: 239764).

#### **Tryptic Soy Agar Minimal (08B)**

##### **Per Liter of medium:**

|                                                 |      |
|-------------------------------------------------|------|
| Osmotic water                                   | 1 L  |
| Tryptic Soy Broth (Sigma, Reference T8907-1 kg) | 3 g  |
| Bacto Agar (BD, Reference 214010 500 g)         | 15 g |

After autoclaving, add 100 mg.L<sup>-1</sup> of cycloheximide (Sigma, Reference: 239764).

#### **Macroalgae-based medium (14B)**

##### **Per Liter of medium:**

|                                                                       |        |
|-----------------------------------------------------------------------|--------|
| Osmotic water                                                         | 900 mL |
| K <sub>2</sub> HPO <sub>4</sub> , (Sigma, Reference: P3786 500 g)     | 3.5 g  |
| KH <sub>2</sub> PO <sub>4</sub> , (VWR, Reference: 1 kg)              | 1.0 g  |
| MgSO <sub>4</sub> *7H <sub>2</sub> O, (Sigma, Reference: 230391 1 kg) | 1.5 g  |
| Glucose (Sigma, Reference: 16301 1 kg)                                | 0.5 g  |
| Bacto Agar (BD, Reference 214010 500 g)                               | 15 g   |

check pH (~6)

After autoclaving, add 50 mL of each macroalgae filtrate (50 ml of the *Ascophyllum nodosum* filtrate and 50 mL of the *Laminaria digitata* filtrate) described in the Material and Methods section of the main text. Also add 100 mg.L<sup>-1</sup> of cycloheximide (Sigma, Reference: 239764).

### **Lichen algal-based medium (15B)**

#### **Per Liter of medium:**

|                                                                   |        |
|-------------------------------------------------------------------|--------|
| Osmotic water                                                     | 900 mL |
| K <sub>2</sub> HPO <sub>4</sub> , (Sigma, Reference: P3786 500 g) | 3.5 g  |
| KH <sub>2</sub> PO <sub>4</sub> , (VWR, Reference: 1 kg)          | 1.0 g  |
| MgSO <sub>4</sub> *7H <sub>2</sub> O, (VWR, Reference: 1 kg)      | 1.5 g  |
| Glucose Sigma, Reference: 16301 1 g)                              | 0.5 g  |
| Bacto Agar (BD, Reference 214010 500 g)                           | 15 g   |

check pH (~6)

After autoclaving, add 50 mL of each macroalgae filtrate (50 ml of the *Ascophyllum nodosum* filtrate and 50 mL of the *Laminaria digitata* filtrate) described in the Material and Methods section of the main text. In addition, add 5 ml of lichen filtrate prepared as described in the main text. Also add 100 mg.L-1 of cycloheximide (Sigma, Reference: 239764).

### **Lichen algal-based minimal medium (16B)**

#### **Per Liter of medium:**

|                                         |        |
|-----------------------------------------|--------|
| Osmotic water                           | 800 mL |
| Sea water                               | 95 mL  |
| Bacto Agar (BD, Reference 214010 500 g) | 15 g   |

check pH (~6)

After autoclaving, add 50 mL of each macroalgae filtrate (50 ml of the *Ascophyllum nodosum* filtrate and 50 mL of the *Laminaria digitata* filtrate) described in the Material and Methods section of the main text. In addition, add 5 mL of lichen filtrate prepared as described in the main text. Also add 100 mg.L-1 of cycloheximide (Sigma, Reference: 239764).

### **Lichen microalgal-based minimal medium (17B)**

#### **Per Liter of medium:**

|                                         |        |
|-----------------------------------------|--------|
| Osmotic water                           | 850 mL |
| Sea water                               | 95 mL  |
| Bacto Agar (BD, Reference 214010 500 g) | 15 g   |

check pH (~6)

After autoclaving, add 50 mL of the *Coccomyxa viridis* filtrate obtained as described in the material and methods section of the main text. In addition, add 5ml of lichen filtrate prepared as described in the main text. Also add 100 mg.L-1 of cycloheximide (Sigma, Reference: 239764).

### **Algae antibiotic-based medium (18F)**

#### **Per Liter of medium:**

|                                                                                                 |        |
|-------------------------------------------------------------------------------------------------|--------|
| Osmotic water                                                                                   | 800 mL |
| Papaic Digest of Soybean Meal (Gibco, Reference 2436 500 g)                                     | 2.0 g  |
| Dextrose (Glucose C <sub>6</sub> H <sub>12</sub> O <sub>6</sub> ) (Sigma, Reference 16301 1 kg) | 1.0 g  |
| Sea water                                                                                       | 100 ml |
| Bacto Agar (BD, Reference 214010 500 g)                                                         | 15 g   |

check pH (~6)

After autoclaving, add 50 mL of each macroalgae filtrate (50 mL of the *Ascophyllum nodosum* filtrate and 50 mL of the *Laminaria digitata* filtrate) described in the Material and Methods section of the main text. Also, add 100 mg.L<sup>-1</sup> of chloramphenicol (Sigma, Reference: C0378-100g), 300 mg.L<sup>-1</sup> of streptomycin (Sigma, Reference: S6501) and 100 mg.L<sup>-1</sup> penicillin (Sigma, Reference: 1504489).

### **Lichen algal antibiotic-based minimal medium (19F)**

#### **Per Liter of medium:**

|                                         |        |
|-----------------------------------------|--------|
| Osmotic water                           | 800 mL |
| Sea water                               | 95 ml  |
| Bacto Agar (BD, Reference 214010 500 g) | 15 g   |

check pH (~6)

After autoclaving, add 50 mL of each macroalgae filtrate (50 mL of the *Ascophyllum nodosum* filtrate and 50 mL of the *Laminaria digitata* filtrate) described in the Material and Methods section of the main text. In addition, add 5 mL of lichen filtrate prepared as described in the main text. Also, add 100 mg.L<sup>-1</sup> of chloramphenicol (Sigma, Reference: C0378-100g), 300 mg.L<sup>-1</sup> of streptomycin (Sigma, Reference: S6501) and 100 mg.L<sup>-1</sup> penicillin (Sigma, Reference: 1504489).

### **Lichen algal antibiotic-based medium (20F)**

|                                                                         |        |
|-------------------------------------------------------------------------|--------|
| Osmotic water                                                           | 800 mL |
| Mycological peptone (Sigma 77199-500 g)                                 | 5 g    |
| Magnesium sulphate (MgSO <sub>4</sub> ) (Sigma, Reference: 77199-500 g) | 2.5 g  |

check pH (~6)

After autoclaving, add 50 mL of each macroalgae filtrate (50 mL of the *Ascophyllum nodosum* filtrate and 50 mL of the *Laminaria digitata* filtrate) described in the Material and Methods section of the main text. In addition, add 5 mL of lichen filtrate prepared as described in the main text. Also, add 100 mg.L<sup>-1</sup> of chloramphenicol (Sigma, Reference: C0378-100g), 300 mg.L<sup>-1</sup> of streptomycin (Sigma, Reference: S6501) and 100 mg.L<sup>-1</sup> penicillin (Sigma, Reference: 1504489).

### **Bacterial identification**

To characterize the bacterial strain collection, we amplified a portion of the 16S rRNA gene. Universal primers 515F (5'-GTGCCAGCMGCCGCGGTAA-3') and 806R (5'-GGACTACVSGGGTATCTAAT-3') [1] were used in 24  $\mu$ L of PCR mix performed with 5X GoTaq® DNA Polymerase (Promega) kit. 2  $\mu$ L of the extracted DNAs were added in the mix. PCR conditions are as follows: 95°C for 5 min and 35 cycles at 95°C for 5 s, 55°C for 30 s, 72°C for 60 s with a final extension at 72°C for 5 min. PCR amplicons were verified by loading 5  $\mu$ L of each product on a 1 % w/v agarose gel. Products showing the suitable band size were then purified by adding 0.5  $\mu$ L of Antarctic phosphatase, 0.5  $\mu$ L of Exonuclease I and 1  $\mu$ L of Phosphatase Buffer to 10  $\mu$ L of PCR product. Sample mixtures were then incubated for 30 min at 37°C and 10 min at 90°C to deactivate the enzyme. Purified PCR products were sequenced at the Macrogen Europe BC (Amsterdam, Netherlands). Chromatograms were individually analyzed with Chromas Lite v 2.6.6 (Technelysium Ltd.) was used for manual corrections of the obtained raw sequences. and used to build a multi-FASTA file. To remove the clonal sequences and group unique sequence clusters, we run the Cd-hit software [2] with the following parameters -c 1 -aS 1 -d 50000 -T 10. Unique bacterial clusters were then integrated into Blastn with parameters: -evalue 0.000001 -num\_threads 10 -max\_target\_seqs 20 -outfmt. A homemade perl script was then used to reconstruct a taxonomy table represent the phylogenetic affiliation of the strains. Bar plots representing the diversity of the bacterial strains were performed with ggplot2 [3].

### Whole-genome Sequencing and bioinformatics

Nine bacterial strains showing the highest antibiotic resistance profile (Supplementary Table S3) and two strains whose 16S sequence fragment did not match in GenBank (CARO-RG-8B-R23-01 and CARO-RG-8B-R24-01) were whole genome sequenced. Prior DNA extraction, strains were grown from 2 to 4 days (depending on the growth rate of the strain) in TSB medium. At the stationary phase, bacterial cultures were centrifuged for 10 min at 5000 rpm and the supernatant was discarded. Bacterial pellet was then washed in sterilized MQ water and further centrifuged for 10 min. The collected pellet was then employed for DNA extraction by using the DNeasy Blood & Tissue Kit of Qiagen. A RNase step (with the Invitrogen™ RNase A 20 mg/mL) was added to the kit protocol to obtain RNA-free DNAs. For this 5  $\mu$ L of RNaseA were added into the samples that were incubated at 65°C for 20 min. The concentration and purity of DNAs were estimated with spectomethry. DNA degradation level was checked by running 3  $\mu$ L of the extracted DNAs on a 1 % w/v agarose gel. Genomic DNA libraries were performed with the Short-Insert Library protocol and sequenced with the DNBseq™ platform (PE150 for sequencing length) at the BGI sequencing facility (Shenzhen, China).

Raw reads in the Fastq file format were filtered by removing adaptor sequenced, contaminations and low-quality reads by BGI. Clean reads were then annotated and assembled by using the Bacannot framework <https://bacannot.readthedocs.io/en/latest/#index--page-root>. KEGG KO annotation was performed with KofamScan version 1.3.0 [4]. Taxonomy affiliation on the whole genome sequences was performed with TYGS (Type Strain Genome Server) <https://tygs.dsmz.de/> [5].

Metabolic functional analysis on the nine bacterial genomes was performed. First, for each bacterial genome, a list of biochemical reactions was inferred from its proteic sequences with Carveme software [6]. Then, each reaction was classified into metabolic pathways by querying the BIGG database [7]. To compare the presence of metabolic pathways and reactions,

presence-absence matrices were computed thanks to ad-hoc programs developed with the Met4j library <sup>1</sup>.

---

<sup>1</sup> <https://forgemia.inra.fr/metexplore/met4j>

**SUPPLEMENTARY TABLES**

**Supplementary Table S1.** Names and GPS coordinates (expressed in degrees) of the 24 sites on which *Rhizocarpon geographicum*.

| <b>Population name</b> | <b>Locality</b> | <b>Altitude (m)</b> | <b>Latitude</b> | <b>Longitude</b>  |
|------------------------|-----------------|---------------------|-----------------|-------------------|
| CROZ-RG-R01            | Crozon          | 30                  | 48.2333333      | -4.565277777777   |
| CROZ-RG-R02            | Crozon          | 50                  | 48.2330556      | -4.56638888888888 |
| CROZ-RG-R03            | Crozon          | 40                  | 48.2319444      | -4.57027777777777 |
| CROZ-RG-R04            | Crozon          | 10                  | 48.2336111      | -4.56555555555555 |
| BAUL-RG-R05            | Baulon          | 60                  | 47.9713889      | -1.8975           |
| BAUL-RG-R06            | Baulon          | 60                  | 47.9713889      | -1.8975           |
| BAUL-RG-R07            | Baulon          | 80                  | 47.9722222      | -1.89749972222222 |
| BAUL-RG-R08            | Baulon          | 80                  | 47.9725         | -1.89749972222222 |
| ITXA-RG-R09            | Itxassou        | 610                 | 43.3052778      | -1.42888888888888 |
| ITXA-RG-R10            | Itxassou        | 610                 | 43.3025         | -1.42805555555555 |
| ITXA-RG-R11            | Itxassou        | 620                 | 43.3022222      | -1.42805555555555 |
| ITXA-RG-R12            | Itxassou        | 660                 | 43.3016667      | -1.4325           |
| MONT-RG-R13            | Plounéour-Ménez | 390                 | 48.4055556      | -3.90999999999999 |
| MONT-RG-R14            | Plounéour-Ménez | 370                 | 48.8369444      | -3.50388888888888 |
| MONT-RG-R15            | Plounéour-Ménez | 380                 | 48.4058333      | -3.90944444444444 |
| MONT-RG-R16            | Plounéour-Ménez | 380                 | 48.4055556      | -3.90916666666666 |
| TREG-RG-R17            | Trégastel       | 10                  | 48.8366667      | -3.50388888888888 |
| TREG-RG-R18            | Trégastel       | 20                  | 48.8369444      | -3.50388888888888 |
| TREG-RG-R19            | Trégastel       | 20                  | 48.8372222      | -3.5              |
| TREG-RG-R20            | Trégastel       | 10                  | 48.8372222      | -3.50194444444444 |
| CARO-RG-R21            | Carolles        | 70                  | 48.7441667      | -1.56944444444444 |
| CARO-RG-R22            | Carolles        | 60                  | 48.7444444      | -1.56972222222222 |
| CARO-RG-R23            | Carolles        | 60                  | 48.7463889      | -1.57055555555555 |
| CARO-RG-R24            | Carolles        | 60                  | 48.7461111      | -1.57055527777777 |

**Supplementary Table S2.** Mass of *R. geographicum* lichen used for bacterial isolation.

| <b>Population name</b> | <b>Mass (mg)</b> |
|------------------------|------------------|
| CROZ-RG-R01            | 80.2             |
| CROZ-RG-R02            | 250              |
| CROZ-RG-R03            | 72.9             |
| CROZ-RG-R04            | 53.5             |
| BAUL-RG-R05            | 33               |
| BAUL-RG-R06            | 80               |
| BAUL-RG-R07            | 33.9             |
| BAUL-RG-R08            | 40.1             |
| ITXA-RG-R09            | 28.9             |
| ITXA-RG-R10            | 37.4             |
| ITXA-RG-R11            | 43.9             |
| ITXA-RG-R12            | 27.4             |
| MONT-RG-R13            | 30.2             |
| MONT-RG-R14            | 32.8             |
| MONT-RG-R15            | 37.6             |
| MONT-RG-R16            | 16.5             |
| TREG-RG-R17            | 164.7            |
| TREG-RG-R18            | 250.7            |
| TREG-RG-R19            | 525.4            |
| TREG-RG-R20            | 449.6            |
| CARO-RG-R21            | 42.2             |
| CARO-RG-R22            | 36.2             |
| CARO-RG-R23            | 48.4             |
| CARO-RG-R24            | 45.4             |



**Supplementary Table S3.** Bacteria isolated on media containing antibiotics and used for the antibiotic susceptibility test. Taxonomic affiliation was assigned by blastn.

| Codes                 | Class               | Order             | Family             | Genus             | Species                                 | Whole genome sequences strains and related NCBI code |
|-----------------------|---------------------|-------------------|--------------------|-------------------|-----------------------------------------|------------------------------------------------------|
| BAUL-RG-20F-R05-01    | Actinomycetia       | Pseudonocardiales | Pseudonocardiaceae | Amycolatopsis     | <i>Amycolatopsis panacis</i>            | no                                                   |
| BAUL-RG-20F-R05-02    | Alphaproteobacteria | Sphingomonadales  | Sphingomonadaceae  | Sphingomonas      | uncultured <i>Sphingomonas</i> sp.      | JAKNQH000000000                                      |
| CARO-RG-19F-E-10-5-02 | Betaproteobacteria  | Burkholderiales   | Oxalobacteraceae   | Janthinobacterium | uncultured <i>Janthinobacterium</i> sp. | no                                                   |
| CARO-RG-20F-R22-02    | Alphaproteobacteria | Sphingomonadales  | Sphingomonadaceae  | Sphingomonas      | uncultured <i>Sphingomonas</i> sp.      | no                                                   |
| CROZ-RG-18F-R02-13    | Gammaproteobacteria | Pseudomonadales   | Pseudomonadaceae   | Pseudomonas       | <i>Pseudomonas</i> sp.                  | no                                                   |
| CROZ-RG-18F-R04-09    | Alphaproteobacteria | Sphingomonadales  | Sphingomonadaceae  | Sphingomonas      | <i>Sphingomonas</i> sp.                 | no                                                   |
| CROZ-RG-18F-R04-10    | Alphaproteobacteria | Sphingomonadales  | Sphingomonadaceae  | Sphingomonas      | <i>Sphingomonas</i> sp.                 | no                                                   |
| CROZ-RG-18F-R04-28    | Alphaproteobacteria | Sphingomonadales  | Sphingomonadaceae  | Sphingomonas      | <i>Sphingomonas</i> sp.                 | no                                                   |
| CROZ-RG-20F-R02-07    | Alphaproteobacteria | Sphingomonadales  | Sphingomonadaceae  | Sphingomonas      | <i>Sphingomonas</i> sp.                 | JAKNQJ000000000                                      |
| CROZ-RG-20F-R04-06    | Gammaproteobacteria | Pseudomonadales   | Pseudomonadaceae   | Pseudomonas       | <i>Pseudomonas helmanticensis</i>       | JAKNQK000000000                                      |
| CROZ-RG-20F-R04-15    | Gammaproteobacteria | Pseudomonadales   | Pseudomonadaceae   | Pseudomonas       | <i>Pseudomonas frederiksbergensis</i>   | JAKNQL000000000                                      |
| CROZ-RG-20F-R04-29    | Alphaproteobacteria | Rhodobacterales   | Rhodobacteraceae   | Paracoccus        | <i>Paracoccus chinensis</i>             | no                                                   |
| ITXA-RG-18F-R10-03    | Alphaproteobacteria | Hyphomicrobiales  | Salinarimonadaceae | Salinarimonas     | <i>Salinarimonas</i> sp. Ri3Pw_6150     | no                                                   |
| ITXA-RG-18F-R10-04    | Alphaproteobacteria | Hyphomicrobiales  | Salinarimonadaceae | Salinarimonas     | <i>Salinarimonas</i> sp. Ri3Pw_6150     | no                                                   |
| ITXA-RG-18F-R10-06    | Alphaproteobacteria | Hyphomicrobiales  | Salinarimonadaceae | Salinarimonas     | <i>Salinarimonas</i> sp. Ri3Pw_6150     | no                                                   |
| ITXA-RG-20F-R09-05    | Alphaproteobacteria | Sphingomonadales  | Sphingomonadaceae  | Sphingomonas      | <i>Sphingomonas</i> sp.                 | no                                                   |
| MONT-RG-20F-E-10-7-01 | Gammaproteobacteria | Pseudomonadales   | Pseudomonadaceae   | Pseudomonas       | uncultured <i>Pseudomonas</i> sp.       | no                                                   |
| MONT-RG-20F-E-10-7-02 | Gammaproteobacteria | Pseudomonadales   | Pseudomonadaceae   | Pseudomonas       | uncultured <i>Pseudomonas</i> sp.       | JAKNQN000000000                                      |
| MONT-RG-20F-R14-05    | Gammaproteobacteria | Pseudomonadales   | Pseudomonadaceae   | Pseudomonas       | <i>Pseudomonas gessardii</i>            | JAKNQM000000000                                      |

Miral et al.,

|                       |                     |                  |                   |              |                                    |                 |
|-----------------------|---------------------|------------------|-------------------|--------------|------------------------------------|-----------------|
| MONT-RG-20F-R15-01    | Alphaproteobacteria | Sphingomonadales | Sphingomonadaceae | Sphingomonas | uncultured <i>Sphingomonas</i> sp. | no              |
| TREG-RG-18F-R20-01    | Alphaproteobacteria | Sphingomonadales | Sphingomonadaceae | Sphingomonas | uncultured <i>Sphingomonas</i> sp. | no              |
| TREG-RG-20F-E-10-5-01 | Gammaproteobacteria | Pseudomonadales  | Pseudomonadaceae  | Pseudomonas  | uncultured <i>Pseudomonas</i> sp.  | JAKNQO000000000 |
| TREG-RG-20F-E-10-6-01 | Gammaproteobacteria | Pseudomonadales  | Pseudomonadaceae  | Pseudomonas  | <i>Pseudomonas</i> sp.             | JAKNQP000000000 |
| TREG-RG-20F-R18-01    | Alphaproteobacteria | Sphingomonadales | Sphingomonadaceae | Sphingomonas | <i>Sphingomonas melonis</i>        | JAKNQQ000000000 |

**Supplementary Table S4.** Antibiotics and relative concentrations ( $\mu\text{g/mL}$ ) used for the antibiotic susceptibility test.

| Antibiotics     | Concentration ( $\mu\text{g/mL}$ ) |
|-----------------|------------------------------------|
| Gentamicin      | 5                                  |
| Ampicillin      | 100                                |
| Streptomycin    | 150                                |
| Kanamycin       | 50                                 |
| Carbenicillin   | 100                                |
| Penicillin G    | 100                                |
| Tetracycline    | 12                                 |
| Rifampicin      | 50                                 |
| Vancomycin      | 10                                 |
| Chloramphenicol | 100                                |
| Colistin        | 5                                  |
| Cefalexin       | 50                                 |

**Supplementary Table S5.** Statistics of clean genomic data obtained after fastq trimming

| Sample name         | Clean Reads | Clean Base    | Read Length | Q20 (%) | GC (%) |
|---------------------|-------------|---------------|-------------|---------|--------|
| BAUL-RG-20F-R05-02  | 4,203,811   | 1,261,143,300 | PE150       | 93.85   | 63.69  |
| CARO-RG-8B-R23-01   | 4,057,029   | 1,217,108,700 | PE150       | 93.51   | 69.56  |
| CARO-RG-8B-R24-01   | 4,052,146   | 1,215,643,800 | PE150       | 94.17   | 64.73  |
| CROZ-RG-20F-R02-07  | 4,205,378   | 1,261,613,400 | PE150       | 93.36   | 67.13  |
| CROZ-RG-20F-R04-06  | 4,126,825   | 1,238,047,500 | PE150       | 93.94   | 58.73  |
| CROZ-RG-20F-R04-15  | 4,131,243   | 1,239,372,900 | PE150       | 94.31   | 58.59  |
| MONT-RG-20F-10-7-02 | 4,028,310   | 1,208,493,000 | PE150       | 94.52   | 59.94  |
| MONT-RG-20F-R14-05  | 4,035,850   | 1,210,755,000 | PE150       | 93.9    | 59.94  |
| TREG-RG-20F-10-5-01 | 4,020,368   | 1,206,110,400 | PE150       | 93.89   | 59.88  |
| TREG-RG-20F-10-6-01 | 4,014,265   | 1,204,279,500 | PE150       | 93.98   | 59.85  |
| TREG-RG-20F-R18-01  | 4,189,150   | 1,256,745,000 | PE150       | 93.4    | 65.03  |

**Supplementary Table S6.** Analysis of Deviance Table (Type II Wald chisquare tests) on the antibiotic resistance coefficient of the 24 strains selected for antibiotic resistance assays. Phase indicates the exponential or stationary phase at which strains have been tested. The phase and the strain *factor* were analyzed as fixed variables. *P* value adjustment was estimated with Tukey method for comparing a family of 48 estimates.

|                      | <i>Chisq</i> | <i>Df</i> | <i>Pr(&gt;Chisq)</i> |
|----------------------|--------------|-----------|----------------------|
| <b>Gentamicin</b>    |              |           |                      |
| Strain               | 393.653      | 23        | <b>&lt;2.2e-16</b>   |
| Phase                | 28.092       | 1         | <b>1.157e-07</b>     |
| Strain:Phase         | 110.249      | 23        | <b>2.280e-13</b>     |
| <b>Ampicillin</b>    |              |           |                      |
| Strain               | 171.0278     | 23        | <b>&lt;2.2e-16</b>   |
| Phase                | 5.5523       | 1         | 0.01846              |
| Strain:Phase         | 80.3465      | 23        | <b>2.79e-08</b>      |
| <b>Streptomycin</b>  |              |           |                      |
| Strain               | 181.1994     | 23        | <b>&lt;2.2e-16</b>   |
| Phase                | 0.9611       | 1         | 0.3269               |
| Strain:Phase         | 103.8320     | 23        | <b>3.047e-12</b>     |
| <b>Kanamycin</b>     |              |           |                      |
| Strain               | 195.614      | 23        | <b>&lt;2.2e-16</b>   |
| Phase                | 29.224       | 1         | <b>6.446e-08</b>     |
| Strain:Phase         | 109.919      | 23        | <b>2.607e-13</b>     |
| <b>Carbenicillin</b> |              |           |                      |
| Strain               | 185.5520     | 23        | <b>&lt;2.2e-16</b>   |
| Phase                | 0.0289       | 1         | 0.8651               |
| Strain:Phase         | 76.0049      | 23        | <b>1.391e-07</b>     |
| <b>Penicillin</b>    |              |           |                      |
| Strain               | 173.1999     | 23        | <b>&lt;2.2e-16</b>   |
| Phase                | 2.1399       | 1         | 0.14351              |

|                        |          |    |                    |
|------------------------|----------|----|--------------------|
| Strain:Phase           | 34.4238  | 23 | 0.05927            |
| <b>Tetracycline</b>    |          |    |                    |
| Strain                 | 458.8361 | 23 | <b>&lt;2.2e-16</b> |
| Phase                  | 1.6341   | 1  | 0.2011             |
| Strain:Phase           | 77.5157  | 23 | <b>7.979e-08</b>   |
| <b>Rifampicin</b>      |          |    |                    |
| Strain                 | 520.8060 | 23 | <b>&lt;2.2e-16</b> |
| Phase                  | 0.7714   | 1  | 0.3798             |
| Strain:Phase           | 78.6529  | 23 | <b>5.239e-08</b>   |
| <b>Vancomycin</b>      |          |    |                    |
| Strain                 | 568.624  | 23 | <b>&lt;2.2e-16</b> |
| Phase                  | 11.026   | 1  | <b>0.0008983</b>   |
| Strain:Phase           | 121.100  | 23 | <b>2.638e-15</b>   |
| <b>Chloramphenicol</b> |          |    |                    |
| Strain                 | 519.4214 | 23 | <b>&lt;2.2e-16</b> |
| Phase                  | 5.5191   | 1  | 0.01881            |
| Strain:Phase           | 175.8313 | 23 | <b>2,00E-16</b>    |
| <b>Colistin</b>        |          |    |                    |
| Strain                 | 507.401  | 23 | <b>&lt;2.2e-16</b> |
| Phase                  | 24.529   | 1  | <b>7.321e-07</b>   |
| Strain:Phase           | 96.928   | 23 | <b>4.750e-11</b>   |
| <b>Cefalexin</b>       |          |    |                    |
| Strain                 | 162.230  | 23 | <b>&lt;2.2e-16</b> |
| Phase                  | 18.782   | 1  | <b>1.466e-05</b>   |
| Strain:Phase           | 103.098  | 23 | <b>4.090e-12</b>   |

**SUPPLEMENTARY FIGURES**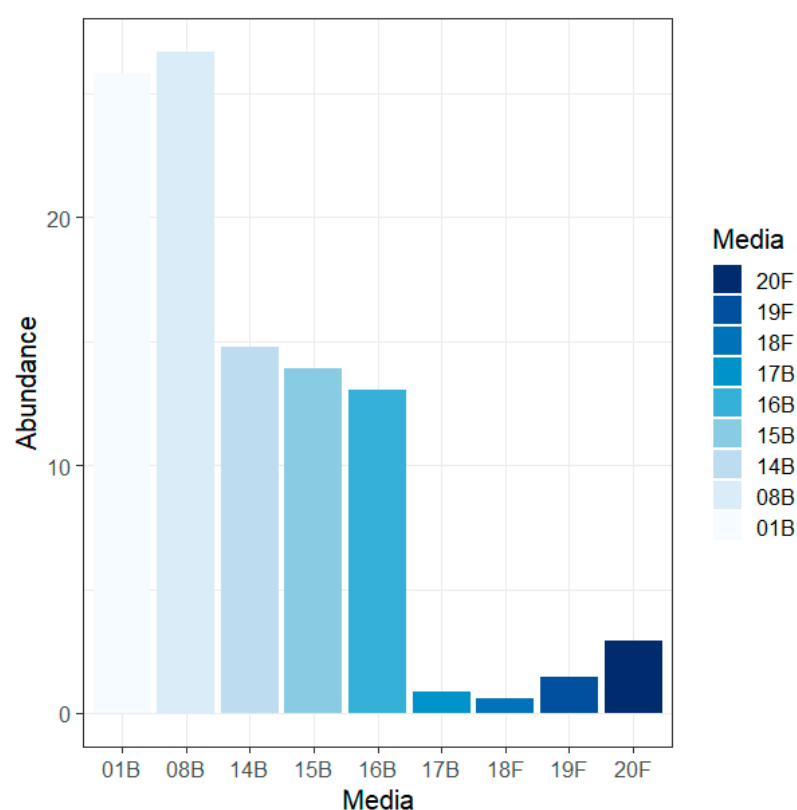

**Figure S1. Number of species isolated for each medium.** Bar plot is based on the abundance of each bacterial species (expressed in %) calculated by dividing the number of species recovered on each medium by the number of the total species recovered. Bleu scale color represents the different media used for bacterial isolation (see Supplementary Methods). Bar plot clearly shows that as observed for the abundance of the bacterial isolated for each medium, the 01B and 08B media recovered the maximum of the bacterial diversity.

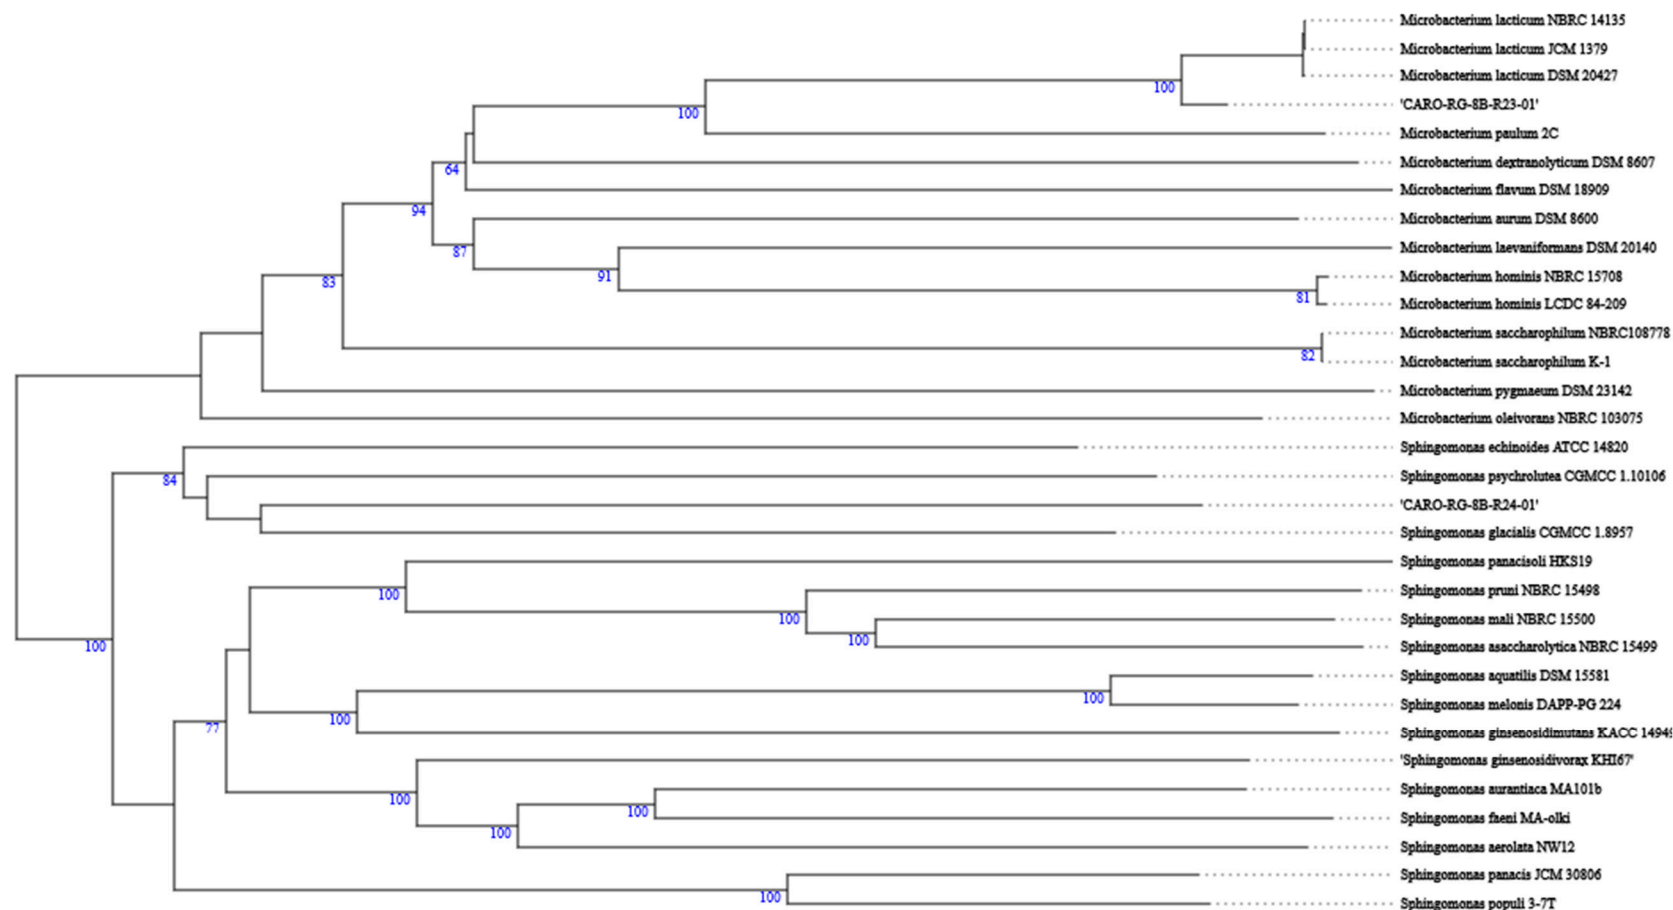

**Figure S2. Phylogenetic tree based on the whole genome of the CARO-RG-8B-R24-01 and CARO-RG-8B-R23-01 strains obtained by the Type Strain Genome Service (TYGS).**

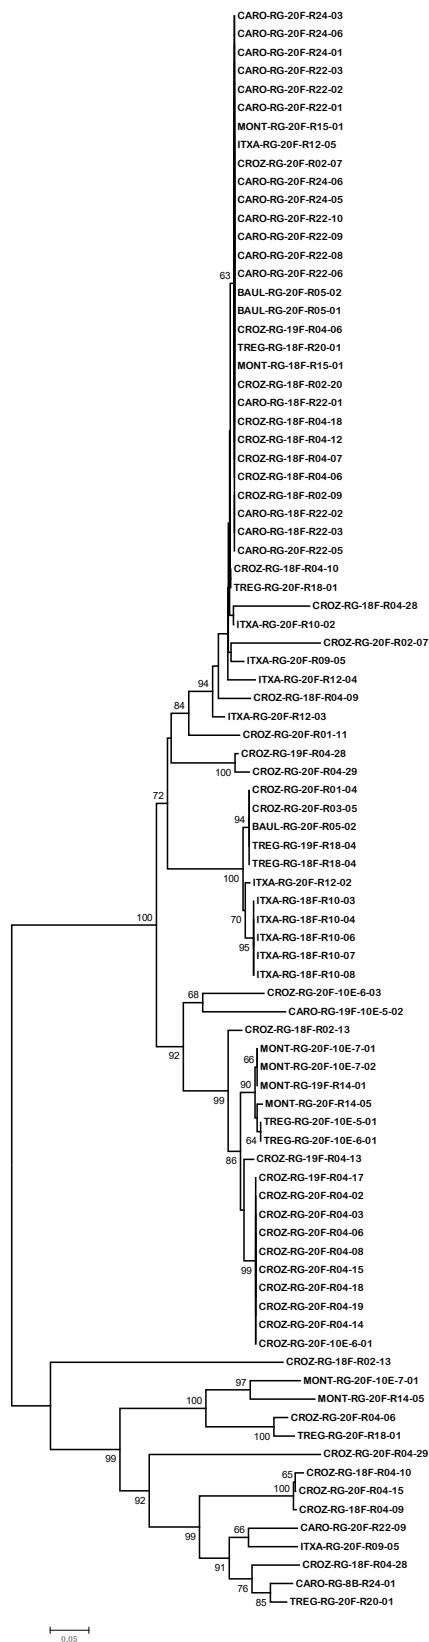

**Figure S3. Phylogenetic tree based on the 16S sequences of strains isolated from media containing antibiotics.**



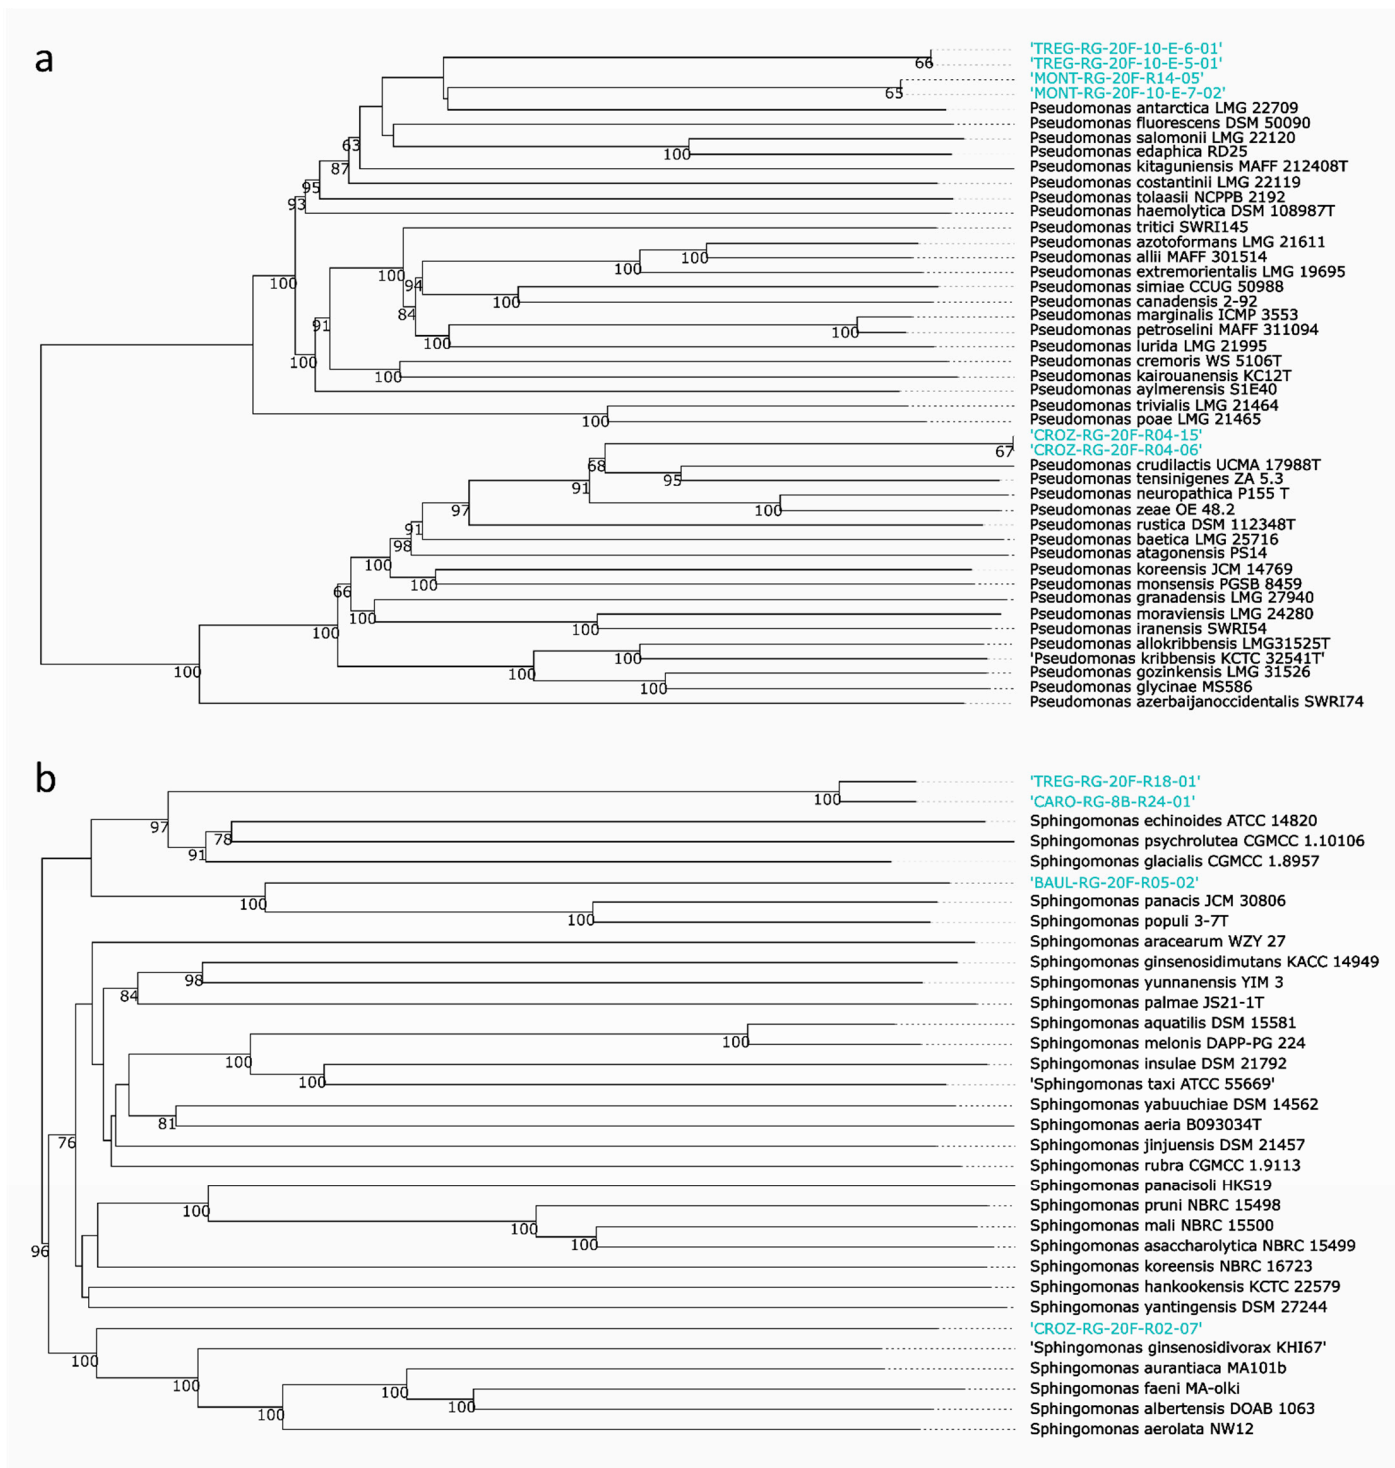

**Figure S4.** Phylogeny representing CROZ-RG-20F-R04-06, CROZ-RG-20F-R04-15, MONT-RG-20F-10-E-7-02, MONT-RG-20F-R14-05, TREG-RG-20F-10-E-5-01 and TREG-RG-20F-10-E-6-01 bacterial strains (a) and BAUL-RG-20F-R05-02, CARO-RG-8B-R24-01, CROZ-RG-20F-R02-07 and TREG-RG-20F-R18-01 (b) bacterial strains. Phylogenetic tree was inferred with FastMe 2.1.6.1 on the TYGS platform [56] from GBDP distances calculated from whole-genomes. The tree was rooted ad midpoint. Strains isolated from *R. geographicum* and the related tree branches are indicated in blue.

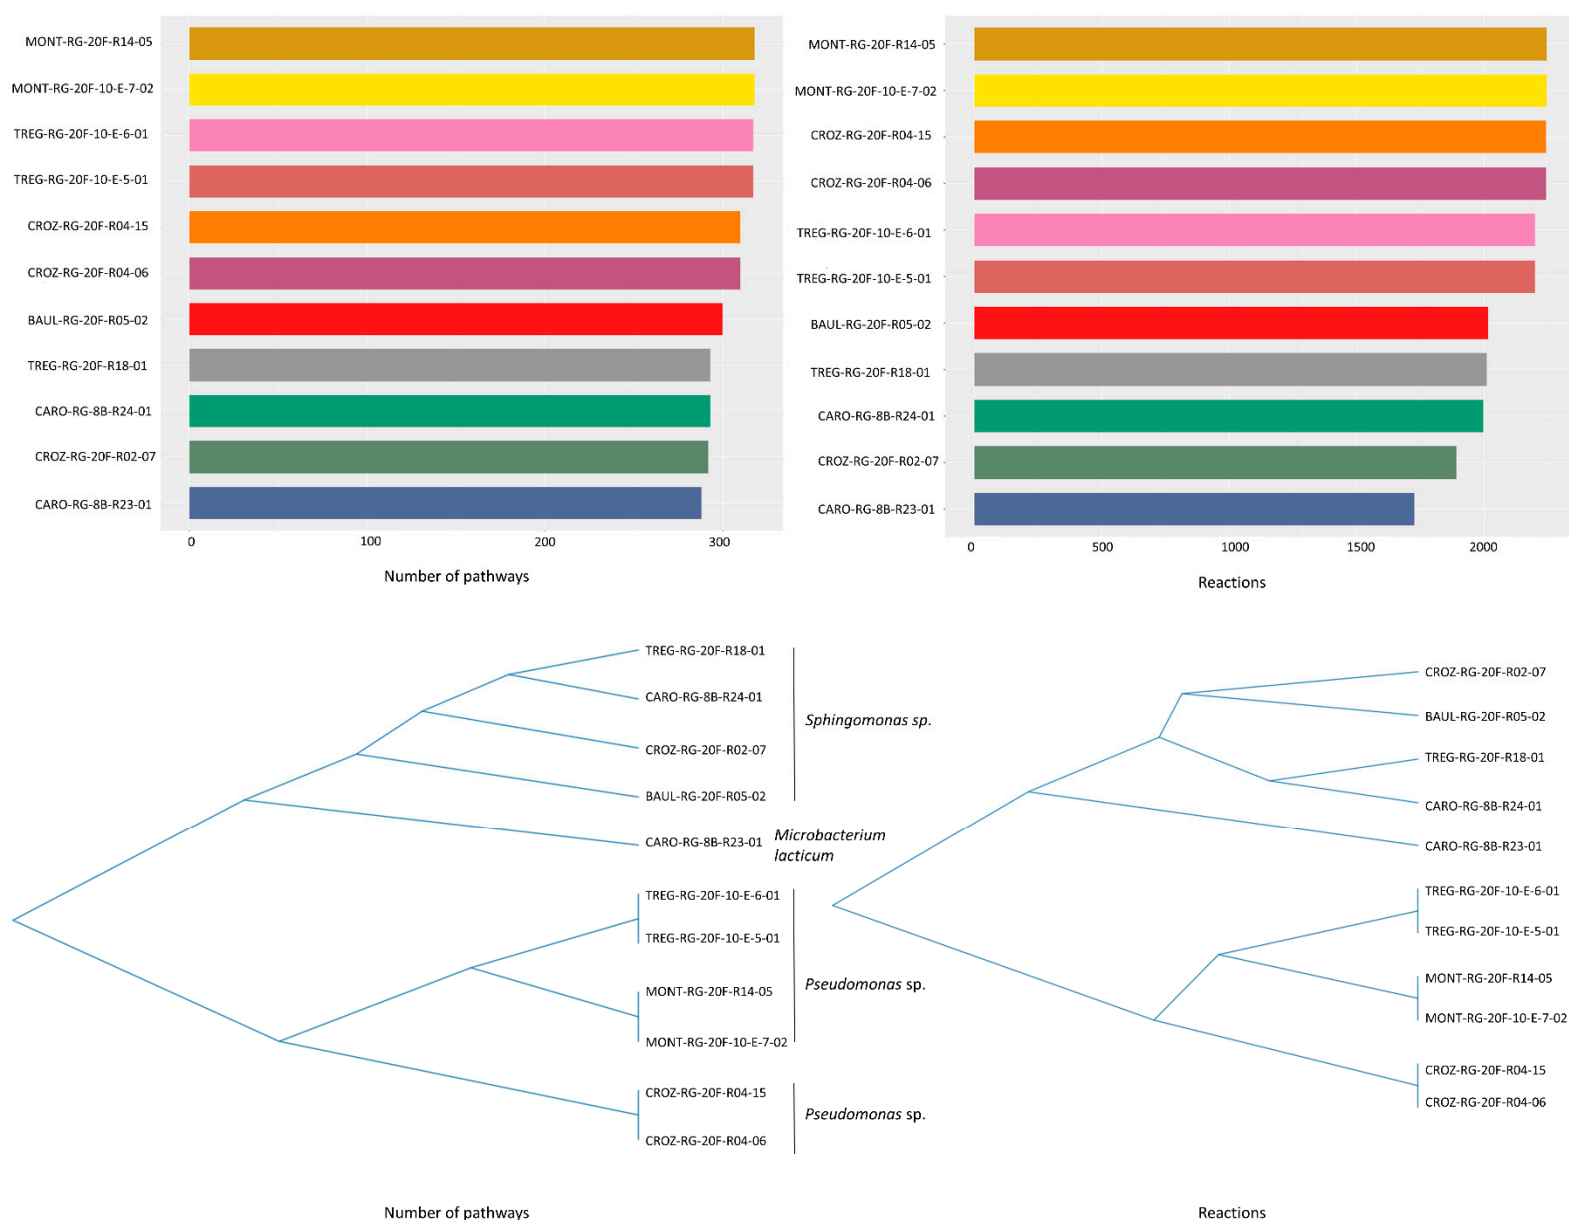

**Figure S5. Network analysis based on genome functional annotation.** Number of pathways (top left barplot) and number of reactions (top right barplot) based on the annotations of the 11 genomes. Clustering analyses based on the presence/absence of biological pathways (bottom left) and biological reactions (bottom right). The functional clustering is coherent with the taxonomical annotation of the strains. Plots were performed thanks to the MeCompR shiny application<sup>2</sup>.

<sup>2</sup> <https://lipm-gitlab.toulouse.inra.fr/lcottret/mecompr>

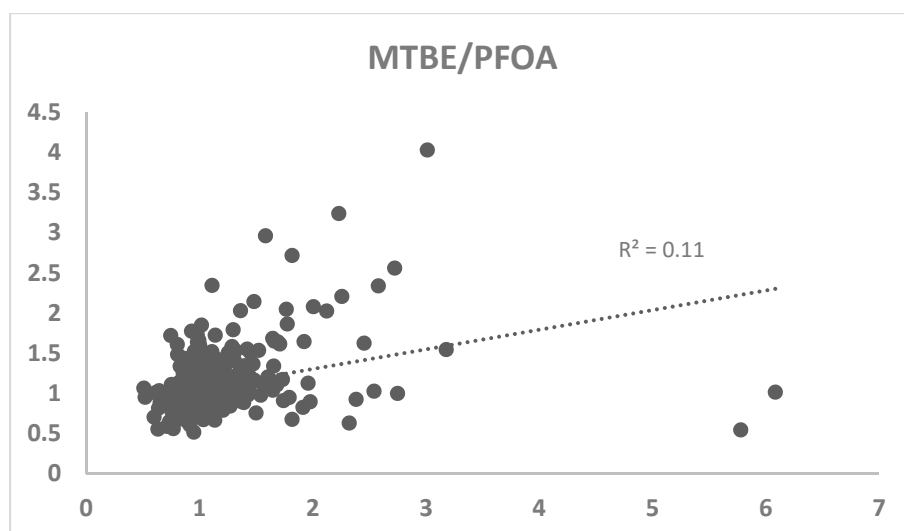

**Figure S6. Correlation between Lsmeans values obtained from the POP tolerance experiment.** *x*-axis represents Lsmeans values obtained from strains grew in presence of PFOA and *y*-axis represents Lsmeans values obtained from strains grew in presence of MTBE. The  $R^2$  representing the correlation between the two variables is also reported.

## References

1. Walters W, Hyde ER, Berg-Lyons D, Ackermann G, Humphrey G, Parada A, et al. Improved Bacterial 16S rRNA Gene (V4 and V4-5) and Fungal Internal Transcribed Spacer Marker Gene Primers for Microbial Community Surveys. *mSystems* 2015; **1**: e00009-15.
2. Li W, Godzik A. Cd-hit: a fast program for clustering and comparing large sets of protein or nucleotide sequences. *Bioinformatics* 2006; **22**: 1658–1659.
3. Ginestet C. ggplot2: Elegant Graphics for Data Analysis. *J R Stat Soc Ser A-Stat Soc* 2011; **174**: 245–245.
4. Aramaki T, Blanc-Mathieu R, Endo H, Ohkubo K, Kanehisa M, Goto S, et al. KofamKOALA: KEGG Ortholog assignment based on profile HMM and adaptive score threshold. *Bioinformatics* 2020; **36**: 2251–2252.
5. Meier-Kolthoff JP, Göker M. TYGS is an automated high-throughput platform for state-of-the-art genome-based taxonomy. *Nat Commun* 2019; **10**: 2182.
6. Machado D, Andrejev S, Tramontano M, Patil KR. Fast automated reconstruction of genome-scale metabolic models for microbial species and communities. *Nucleic Acids Res* 2018; **6**: 7542–7553.
7. King ZA, Dräger A, Miller P, Federowicz S, Lerman JA, Ebrahim A, Palsoon BA, Lewis NE. BiGG Models: A platform for integrating, standardizing and sharing genome-scale models. *Nucleic Acids Res* 2015; **44**: 515–522.
